# Supplementary material for: cGAS-STING pathway expression correlates with genomic instability and immune cell infiltration in breast cancer
Source: Springer Nature journal article supplement (doi:10.1038/s41523-023-00609-z), 2024-01-02
Supplement: MOESM1 [file 41523_2023_609_MOESM1_ESM.pdf]

**Supplementary information for:**

**Expression of the cGAS-STING pathway is associated with high levels of  
genomic instability and immune cell infiltration in breast cancer**

Mengting Chen, Shibo Yu, Tineke van der Sluis, Mieke C. Zwager, Bert van der Vegt,  
Marcel A. T. M. van Vugt\*

\*corresponding author: [m.vugt@umcg.nl](mailto:m.vugt@umcg.nl)

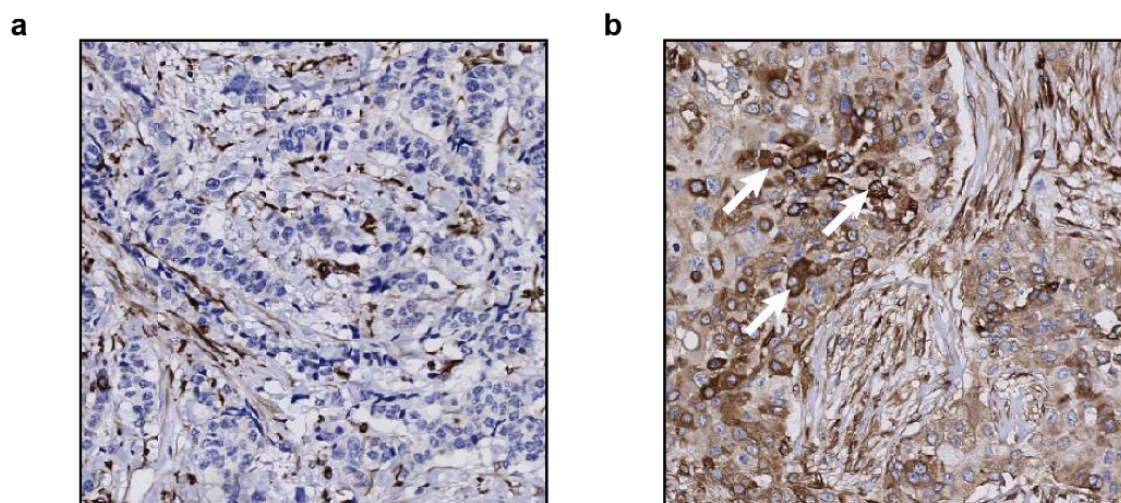

**Supplementary Figure 1. Representative images of quantification of pnSTING tumor cells. (a)** A TMA core with negative pnSTING expression. **(b)** A TMA core with positive pnSTING expression. White arrows represent pnSTING-positive cells.

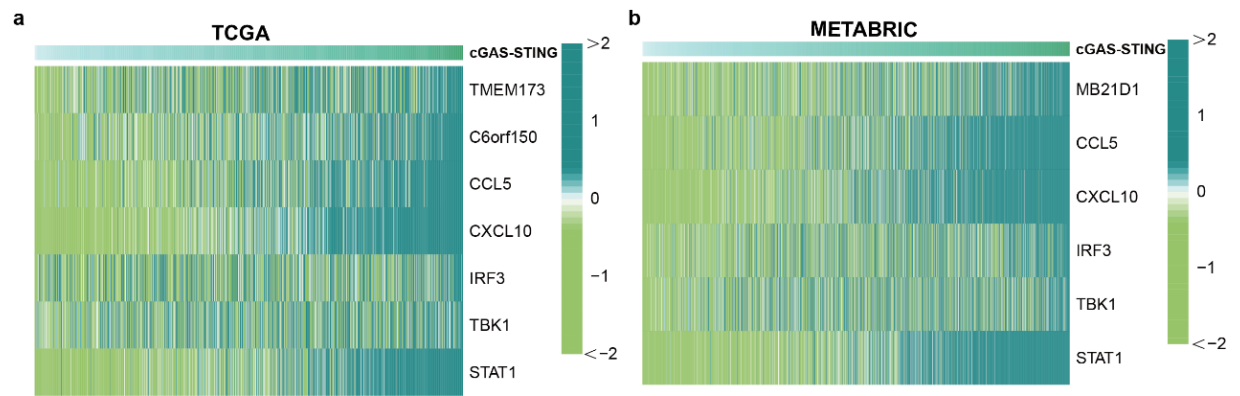

**Supplementary Figure 2. The expression of genes which compose cGAS-STING score in breast cancer. (a, b) Heatmap of expression of cGAS-STING-related genes ranked by the cGAS-STING score in the TCGA (a) and METABRIC (b) database.**

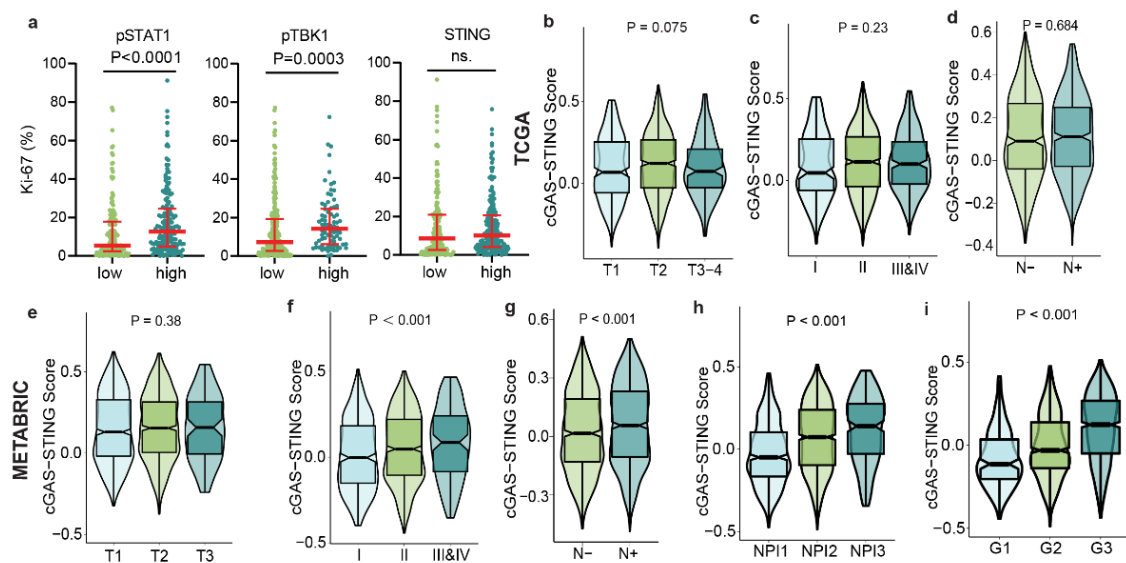

**Supplementary Figure 3. Comparison of cGAS-STING signaling and patient clinical characteristics.** **(a)** Comparison of percentage of Ki-67-positive cells in tumors with low or high cGAS-STING components. **(b-d)** Comparison of cGAS-STING scores among patients with different tumor size (b), tumor stage (c) and lymph node status (d) in the TCGA database. The bottom and top of the boxes indicate the 25th and 75th percentiles; Statistical significance was tested by Wilcoxon rank-sum test or Kruskal–Wallis test. **(e-i)** Comparison of cGAS-STING scores among patients with different tumor size (e), tumor stage (f), lymph node status (g), Nottingham prognostic index (h), histologic Grade (i) in the METABRIC cohort. The bottom and top of the boxes indicate the 25th and 75th percentiles; Statistical significance was tested by Wilcoxon rank-sum test or Kruskal–Wallis test.

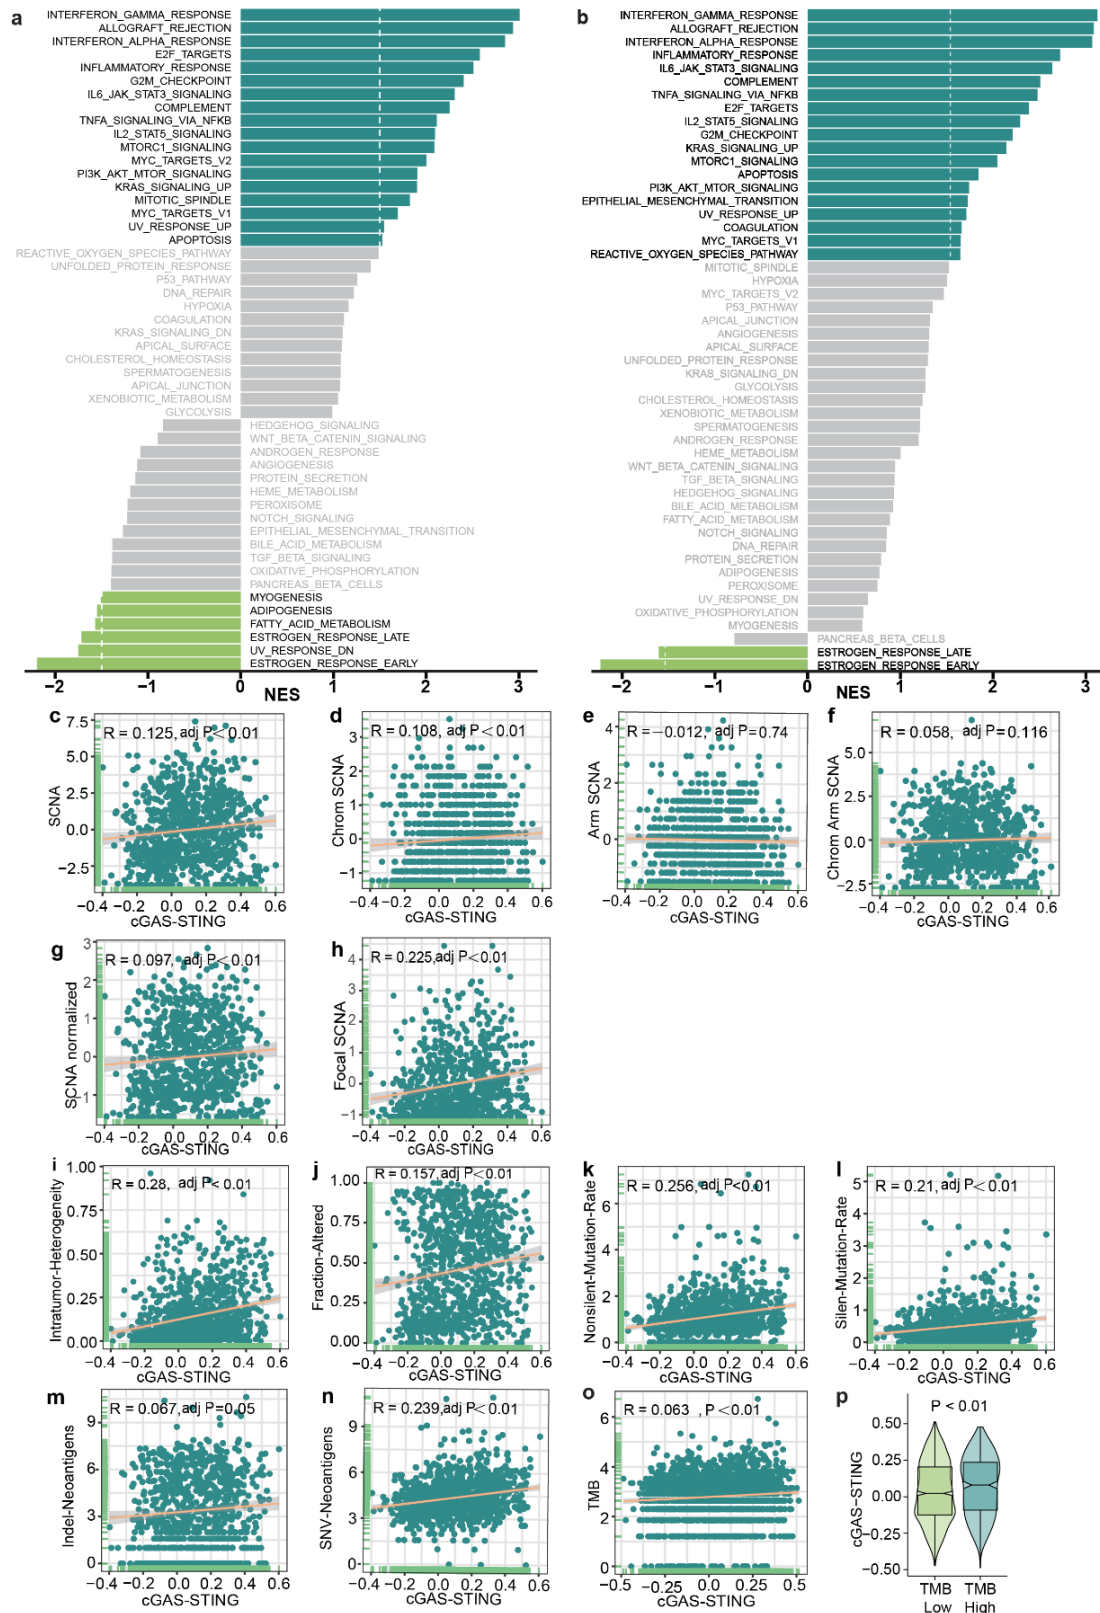

**Supplementary Figure 4. Higher cGAS-STING score is associated with genomic instability in breast cancer. Figure legend continues on next page.**

#### **Supplementary Figure 4 (continued)**

**(a, b)** GSEA enrichment results with Normalized Enrichment Scores (NES) of all biological pathways in the METABRIC (a) and TCGA (b) database, the dotted line indicates the threshold of NES  $>1.5$  or  $<-1.5$ . **(c-h)** Spearman correlation between cGAS-STING score and different types of somatic copy number alterations (sCNAs) levels in the TCGA database. **(i-n)** Spearman correlation between cGAS-STING score, intratumor heterogeneity and different mutation-related scores in the TCGA database related to Fig. 4g. **(o)** Spearman correlation between cGAS-STING score and Tumor Mutation Burden (TMB) score (log2 transformed) in the METABRIC database. **(p)** The difference of cGAS-STING score between TMB high and TMB low subgroups in the METABRIC database. The bottom and top of the boxes are the 25th and 75th percentiles; Statistical significance was tested by Wilcoxon rank-sum test.

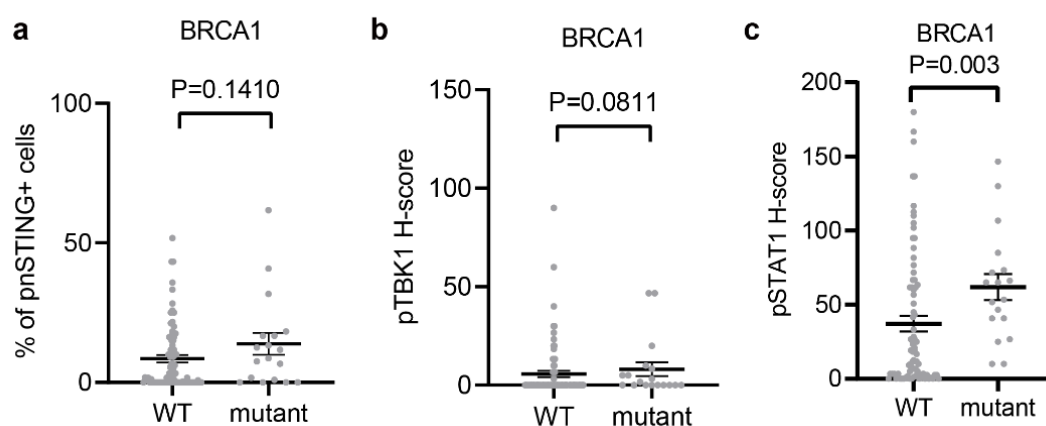

**Supplementary Figure 5. The expression of inflammatory signaling based on BRCA1 status.** The percentage of pnSTING<sup>+</sup> cells (A) and H-scores of pTBK1 (B) and pSTAT1 (C) in BRCA1 wildtype (WT, n=82) and mutant (n=18) breast cancer patients. Error bars represent mean  $\pm$  SEM. Statistical significance was tested by Wilcoxon rank-sum test.

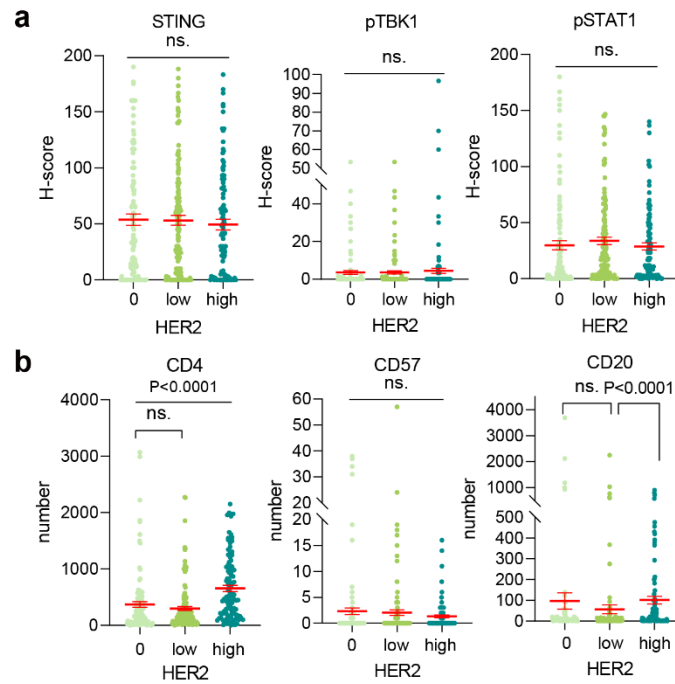

**Supplementary Figure 6. Expression of cGAS-STING signaling components and immune cell infiltration does not differ between HER2-0 and HER2-low patients.**

**(a)** Comparison of cGAS-STING signaling expression among HER2-0, HER2-low and HER2-high (positive) breast cancers. **(b)** Comparison of immune cell infiltration among HER2-0, HER2-low and HER2-high (positive) breast cancer. Error bars represent mean  $\pm$  SEM. Statistical significance was tested by Kruskal–Wallis test.



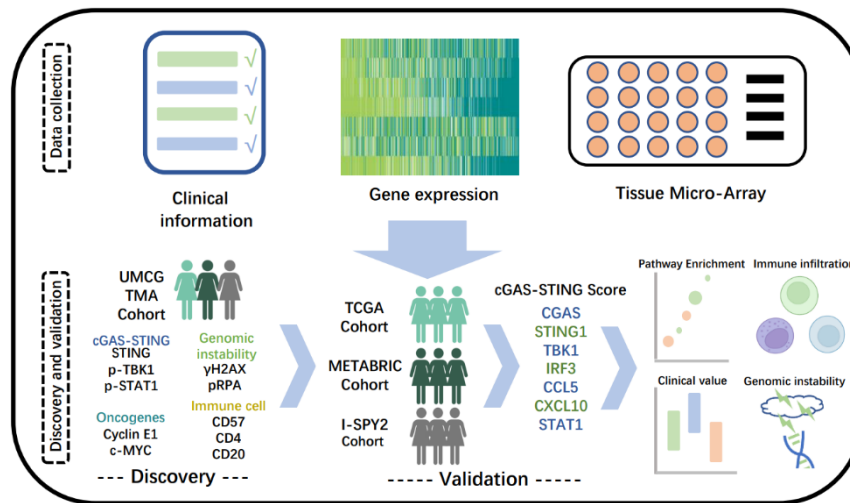

**Supplementary Figure 7. Flowchart of this study.** Evaluating the cGAS-STING Score in four independent cohorts (UMCG /TCGA/METABRIC/I-SPY2) and analyzing the characteristics of the cGAS-STING score in terms of pathway enrichment, immune infiltration, clinical value and genomic instability in breast cancer patients.

**Supplementary Table 1. Spearman correlation among the inflammatory signaling proteins.**

|         |             | pnSTING          | pTBK1 | pSTAT1           |
|---------|-------------|------------------|-------|------------------|
| STING   | correlation | 0.810            | 0.024 | 0.054            |
|         | P value     | <b>&lt;0.001</b> | 0.644 | 0.297            |
| pnSTING | correlation | -                | 0.045 | 0.157            |
|         | P value     |                  | 0.396 | <b>0.002</b>     |
| pTBK1   | correlation | -                | -     | 0.339            |
|         | P value     |                  |       | <b>&lt;0.001</b> |

**Supplementary Table 2. Names and Entrez ID of cGAS-STING-related genes.**

| <b>Gene symbol</b> | <b>Full name</b>                                     | <b>Others gene symbol</b> | <b>Entrez ID</b> |
|--------------------|------------------------------------------------------|---------------------------|------------------|
| CGAS               | Cyclic GMP-AMP Synthase                              | C6orf150/ MB21D1          | 115004           |
| CCL5               | C-C Motif Chemokine Ligand 5                         | TCP228                    | 6352             |
| CXCL10             | C-X-C Motif Chemokine Ligand 10                      | IP-10/ GIP-10             | 3627             |
| IRF3               | Interferon Regulatory Factor 3                       | IIE7/ IRF-3               | 3661             |
| TBK1               | TANK Binding Kinase 1                                | NAK                       | 29110            |
| STING1             | Stimulator Of Interferon Response CGAMP Interactor 1 | STING/ TMEM17             | 340061           |
| STAT1              | Signal Transducer And Activator Of Transcription 1   | STAT91/ ISGF-3            | 6772             |

**Supplementary Table 3. Relation between inflammatory signaling protein expression and patient clinicopathological characteristics.**

|                    |                | pSTAT1 |      |                  | pTBK1 |      |              | STING |      |              |
|--------------------|----------------|--------|------|------------------|-------|------|--------------|-------|------|--------------|
|                    |                | low    | high | P                | low   | high | P            | low   | high | P            |
| Menopausal status  | Premenopausal  | 34     | 60   | <b>0.008</b>     | 73    | 25   | 0.704        | 52    | 42   | 0.337        |
|                    | Perimenopausal | 19     | 18   |                  | 29    | 9    |              | 16    | 20   |              |
|                    | Postmenopausal | 92     | 91   |                  | 139   | 37   |              | 84    | 99   |              |
|                    | Unknown        | 35     | 19   |                  | 43    | 11   |              | 30    | 24   |              |
| Histological grade | I              | 48     | 24   | <b>&lt;0.001</b> | 64    | 9    | <b>0.004</b> | 39    | 32   | 0.557        |
|                    | II             | 68     | 57   |                  | 103   | 22   |              | 60    | 65   |              |
|                    | III            | 65     | 107  |                  | 115   | 52   |              | 83    | 89   |              |
|                    | Unknown        | 1      | 0    |                  | 1     | 0    |              | 1     | 0    |              |
| T                  | T1             | 103    | 126  | <b>0.038</b>     | 174   | 54   | 0.861        | 110   | 118  | 0.804        |
|                    | T2             | 73     | 57   |                  | 100   | 27   |              | 62    | 62   |              |
|                    | T3             | 5      | 2    |                  | 6     | 21   |              | 4     | 4    |              |
|                    | T4             | 0      | 3    |                  | 2     | 1    |              | 2     | 2    |              |
| N                  | N0             | 124    | 125  | 0.309            | 187   | 62   | 0.635        | 114   | 135  | <b>0.003</b> |
|                    | N1             | 36     | 34   |                  | 56    | 12   |              | 35    | 35   |              |
|                    | N2             | 13     | 17   |                  | 23    | 6    |              | 24    | 6    |              |
|                    | N3             | 4      | 11   |                  | 10    | 3    |              | 10    | 5    |              |

**Supplementary Table 4. Univariate COX regression analysis patient survival based on inflammatory signaling proteins.**

|             | HR    | 95% CI      | P value |
|-------------|-------|-------------|---------|
| <b>BCSS</b> |       |             |         |
| STING       |       |             |         |
| low         | 1.007 | 0.478-2.121 | 0.986   |
| high        | Ref.  |             |         |
| pnSTING     |       |             |         |
| low         | 1.051 | 0.491-2.251 | 0.898   |
| high        | Ref.  |             |         |
| pTBK1       |       |             |         |
| low         | 0.424 | 0.174-1.036 | 0.06    |
| high        | Ref.  |             |         |
| <b>RFS</b>  |       |             |         |
| pSTAT1      |       |             |         |
| low         | 0.720 | 0.436-1.188 | 0.198   |
| high        | Ref.  |             |         |
| STING       |       |             |         |
| low         | 1.075 | 0.650-1.777 | 0.777   |
| high        | Ref.  |             |         |
| pnSTING     |       |             |         |
| low         | 1.029 | 0.588-1.605 | 0.910   |
| high        | Ref.  |             |         |
| pTBK1       |       |             |         |
| low         | 1.063 | 0.623-1.701 | 0.910   |
| high        | Ref.  |             |         |

**BCSS:** breast cancer-specific survival; **RFS:** relapse-free survival

**Supplementary Table 5. Published codes and publicly available tools used in this study.**

| Resource                     | Source                                                                                                                                                          | Related figures or data                                                        |
|------------------------------|-----------------------------------------------------------------------------------------------------------------------------------------------------------------|--------------------------------------------------------------------------------|
| R package, “pheatmap”        | <a href="https://cran.r-project.org/web/packages/pheatmap/index.html">https://cran.r-project.org/web/packages/pheatmap/index.html</a>                           | Heatmap                                                                        |
| R package, “ggplot2”         | <a href="https://cran.r-project.org/web/packages/ggplot2/index.html">https://cran.r-project.org/web/packages/ggplot2/index.html</a>                             | Visualization of box plot, Violin plot, Bubble plot, Bar plot and Scatter plot |
| R package, “clusterProfiler” | <a href="https://bioconductor.org/packages/release/bioc/html/clusterProfiler.html">https://bioconductor.org/packages/release/bioc/html/clusterProfiler.html</a> | Enrichment analysis                                                            |
| R package, “Limma”           | <a href="https://bioconductor.org/packages/release/bioc/html/limma.html">https://bioconductor.org/packages/release/bioc/html/limma.html</a>                     | Differential expression analysis                                               |
| R package, “GSVA”            | <a href="https://www.bioconductor.org/packages/release/bioc/html/GSVA.html">https://www.bioconductor.org/packages/release/bioc/html/GSVA.html</a>               | ssGSEA was performed using GSVA to calculate the cGAS-STING enrichment score   |
